# Supplementary material for: New high-energy-density GeTe-based anodes for Li-ion batteries
Source: Royal Society of Chemistry journal article supplement (doi:10.1039/c8ta12094c), 2019-01-01
Supplement: c8ta12094c1.pdf [file c8ta12094c1.pdf]

**Supplementary Information:**

# New High-Energy-Density GeTe-Based Anodes for Li-Ion Batteries

*Ki-Hun Nam,<sup>‡a</sup> Geon-Kyu Sung,<sup>‡a</sup> Jeong-Hee Choi,<sup>□b</sup> Jong-Sang Youn,<sup>c</sup> Ki-Joon Jeon,<sup>□c</sup> and Cheol-Min Park<sup>□a</sup>*

*<sup>a</sup> School of Materials Science and Engineering, Kumoh National Institute of Technology, 61 Daehak-ro, Gumi, Gyeongbuk 39177, Republic of Korea. E-mail: cmpark@kumoh.ac.kr; Fax: +82-54-478-7769; Tel: +82-54-478-7746*

*<sup>b</sup> Battery Research Center, Korea Electrotechnology Research Institute, 12 Boolmosan-ro, Changwon, Gyeongnam 51543, Republic of Korea. E-mail: dodgers@keri.re.kr; Fax: +82-55-280-1590; Tel: +82-55-280-1367*

*<sup>c</sup> Department of Environmental Engineering, Inha University, 100 Inha-ro, Nam-gu, Incheon 22212, Republic of Korea. E-mail: kjeon@inha.ac.kr; Tel: +82-32-860-7509*

*<sup>‡</sup>K.-H. Nam and G.-K. Sung contributed equally to this work.*

## 1. Morphology and electrochemical behaviors of bulk- and nanocrystalline-Ge.

To examine the contribution of Ge in the GeTe, ball-milled Ge (BM-Ge) was prepared using a BM for 6 h with bulk-Ge powder. The XRD, SEM image, and particle size distribution analysis confirmed that the bulk-Ge has tens of micron-sized Ge particles (Figure S1a and b) with a well-developed cubic crystalline structure (S.G. Fd3m,  $a=5.657 \text{ \AA}$ , Figure S1a and b) and the BM-Ge has several micron-sized Ge particles, which is composed of agglomerated Ge nanocrystallites ( $\sim 16 \text{ nm}$ , estimated by the Scherrer eq., Figure S1c and d). Figure S1e and f compare the electrochemical behaviors of bulk- and nanocrystalline-Ge (prepared by BM) particles for LIBs. The bulk- and nanocrystalline-Ge electrodes showed similar high initial Li-insertion capacities ( $1393 \text{ mA h g}^{-1}$  for bulk-Ge and  $1429 \text{ mA h g}^{-1}$  for nanocrystalline-Ge, Figure S1e and f). However, the reversible capacities of the bulk- and nanocrystalline-Ge decreased to  $148 \text{ mA h g}^{-1}$  and  $205 \text{ mA h g}^{-1}$  after 10 cycles. The poor capacity retention of the Ge was caused by the large volume change that occurred during the formation of the  $\text{Li}_{3.75}\text{Ge}$  phase.

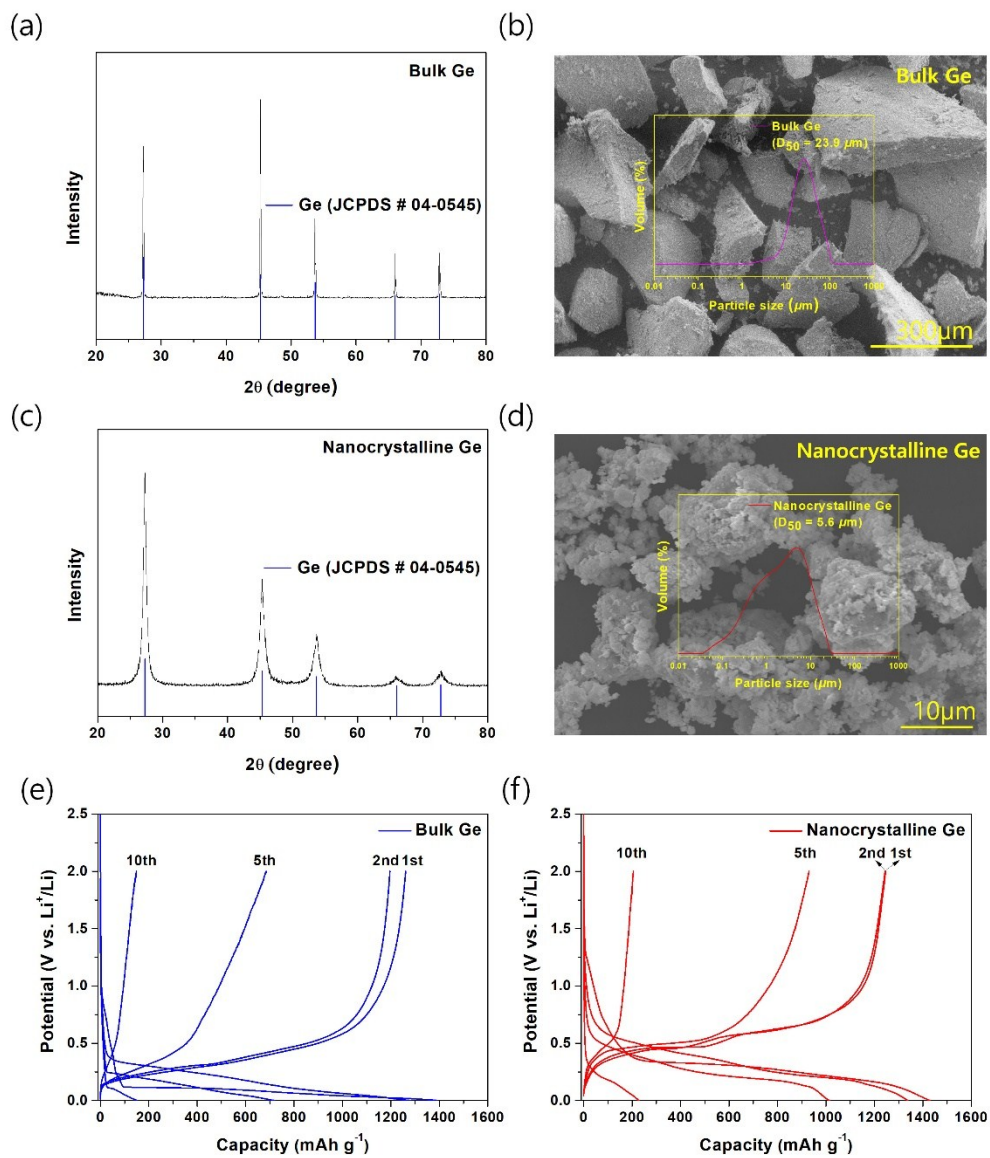

**Figure S1. XRD, morphology, and electrochemical behaviors of bulk- and nanocrystalline-Ge.** (a) XRD result of bulk-Ge. (b) SEM image and particle size distribution result of bulk-Ge. (c) XRD result for nanocrystalline-Ge. (d) SEM image and particle size distribution result of nanocrystalline-Ge. (e) Voltage profiles of bulk-Ge electrode (current density:  $100 \text{ mA g}^{-1}$ ). (f) Voltage profiles of nanocrystalline-Ge electrode (current density:  $100 \text{ mA g}^{-1}$ ).

## 2. XRD and electrochemical behavior of bulk-Te.

Figure S2a shows XRD result of bulk-Te, which shows the well developed cubic crystalline-structured Te (S.G. P3121,  $a=4.457 \text{ \AA}$ ,  $c=5.927 \text{ \AA}$ , Figure S2a). The voltage profiles of bulk-Te for the LIB (current density:  $100 \text{ mA g}^{-1}$ ) showed a small first Li-insertion/extraction capacity of  $199/133 \text{ mA h g}^{-1}$  with a high ICE of 66.8% (Figure S2b). Considering the theoretical capacity of  $420 \text{ mA h g}^{-1}$  (calculated based on the final phases of  $\text{Li}_2\text{Te}$  phase) of Te, the Te electrode exhibited poor Li-reversibilities and capacity retentions.

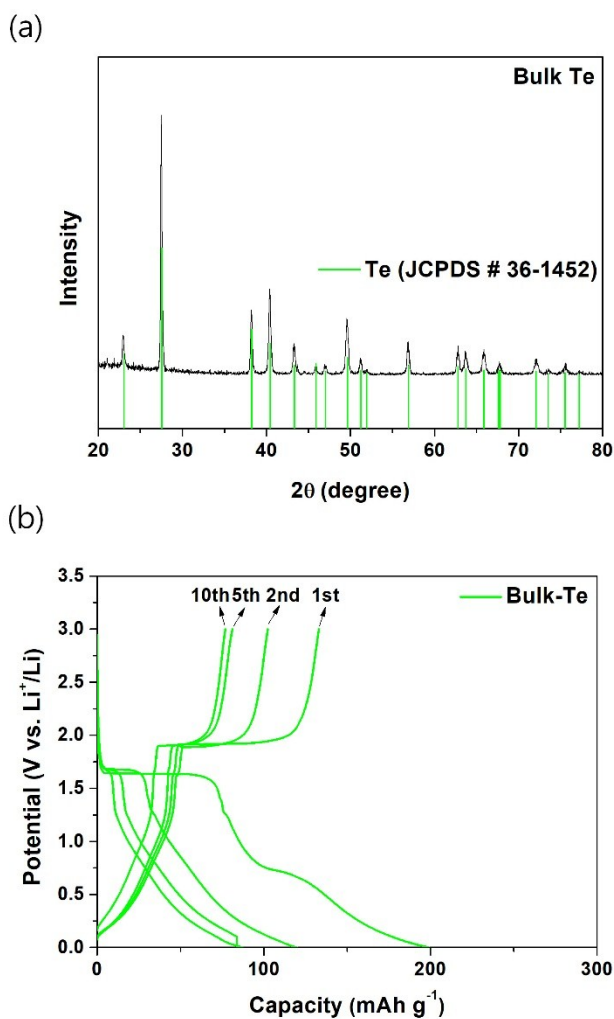

**Figure S2. XRD and electrochemical behavior of bulk-Te.** (a) XRD result of bulk-Te. (b) Voltage profiles of bulk-Te electrode (current density:  $100 \text{ mA g}^{-1}$ ).

### 3. EXAFS spectra of the GeTe-C.

The main Ge K-edge EXAFS peaks (1.3, 1.85, and 2.33 Å) of GeTe/C well matched those of the GeTe reference (Figure S3).

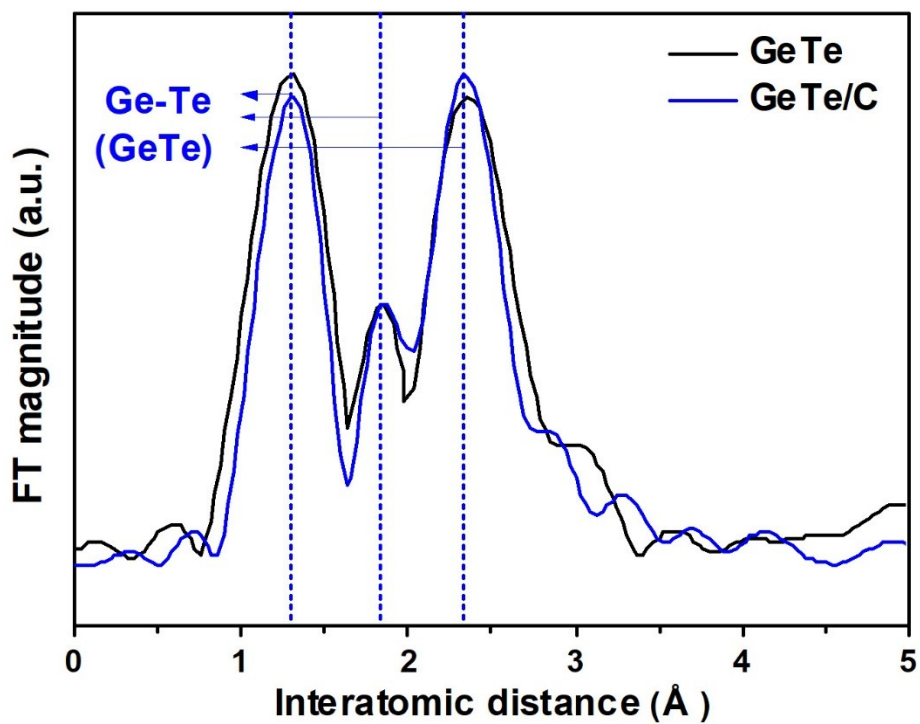

Figure S3. EXAFS spectra of the GeTe and GeTe-C.

#### 4. Morphological characteristics of GeTe–C.

Figure S4 shows the SEM image with a particle size distribution result for the synthesized GeTe–C, which confirms that its average particle size was approximately 6.6  $\mu\text{m}$ .

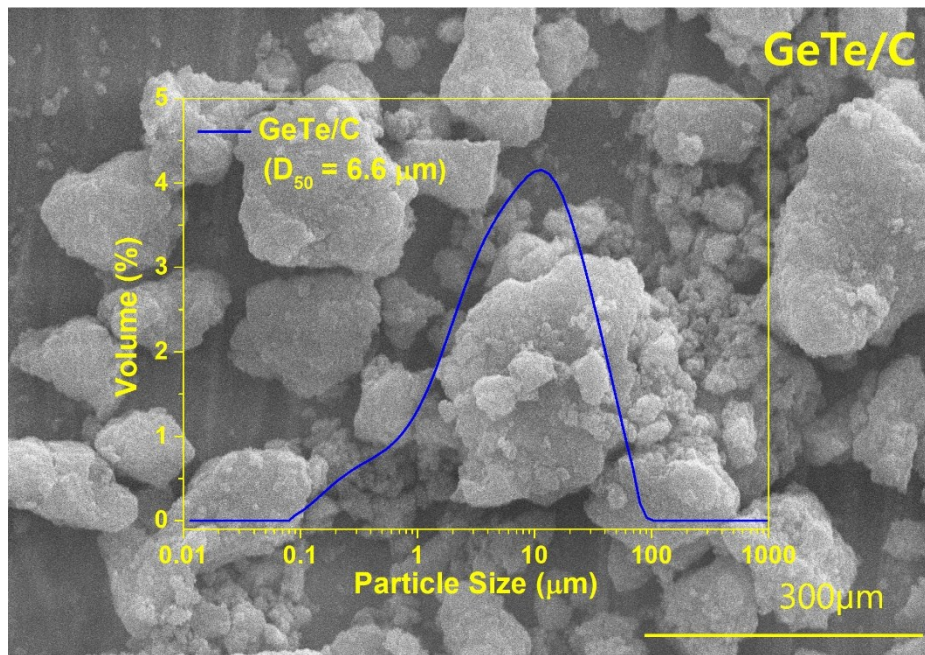

Figure S4. SEM image with a particle size distribution result of GeTe–C.

## 5. Cyclic voltammetry results for the GeTe-C.

CV for the first and second cycles of the GeTe-C was performed, as shown in Figure S5. The CV data of the GeTe-C revealed three broad and large peaks during Li-insertion and three broad and large peaks during Li-extraction.

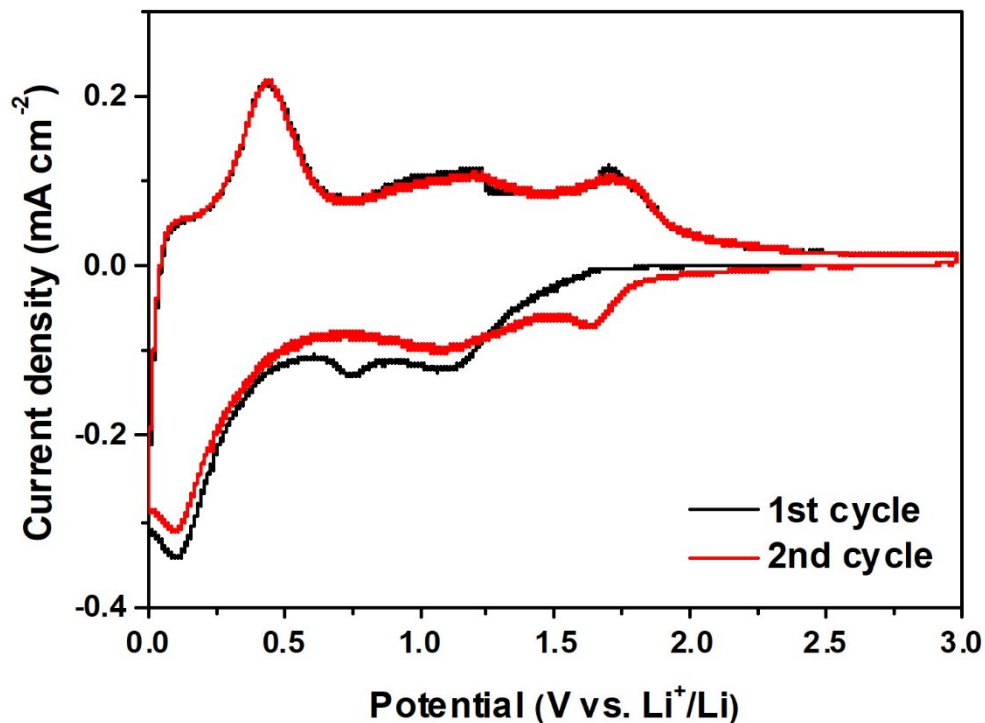

Figure S5. First and second CV plot results of the GeTe-C.

## 6. *Ex situ* XRD results of the GeTe–C during the Li-insertion/extraction.

*Ex situ* XRD results of the GeTe–C during Li-insertion/extraction were performed based on the dQ/dV plot, and the results are shown in Figure S6. However, all the *ex situ* XRD peaks during Li-insertion/extraction were amorphized.

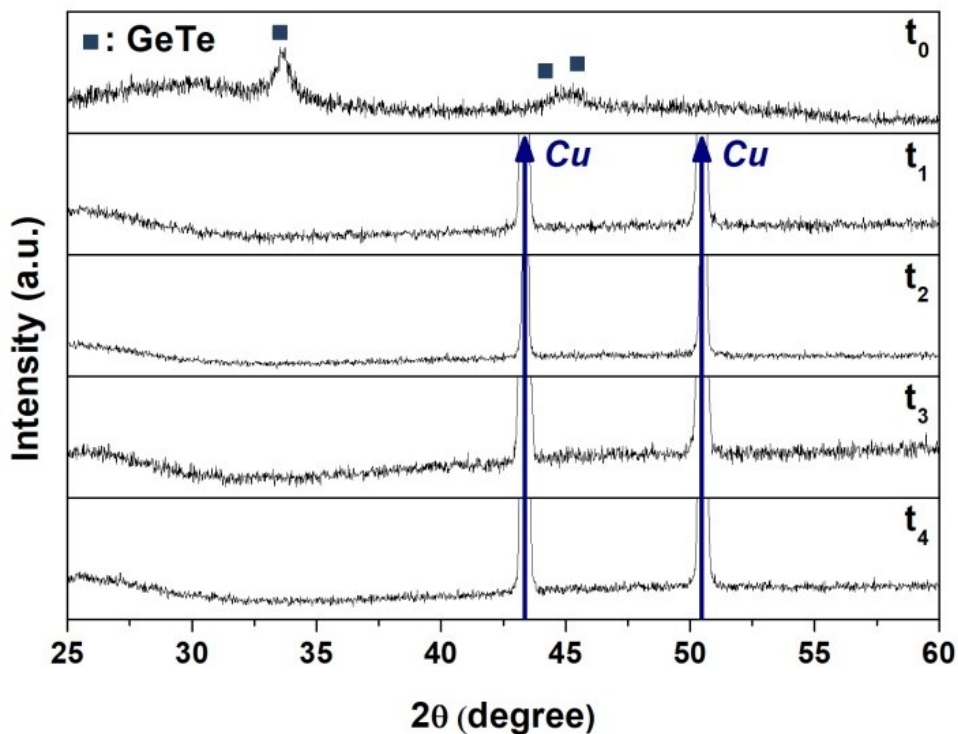

Figure S6. *Ex situ* XRD results of the GeTe–C during the first cycle.



## 7. Electrochemical performances of the BM-C electrode.

Figure S7 shows the electrochemical performance of the BM-C electrode. Figure S7a and b show the voltage profile and cycling performance of the BM-C electrode at a current density of  $100 \text{ mA g}^{-1}$ . The BM-C electrode showed a high initial Li-insertion/extraction capacity of  $916/560 \text{ mA h g}^{-1}$ , with an ICE of 61.1% (Figure S7a). The BM-C electrode showed very stable capacity retention (*ca.* 82.1%) of the initial Li-extraction capacities after 30 cycles (Figure S7b).

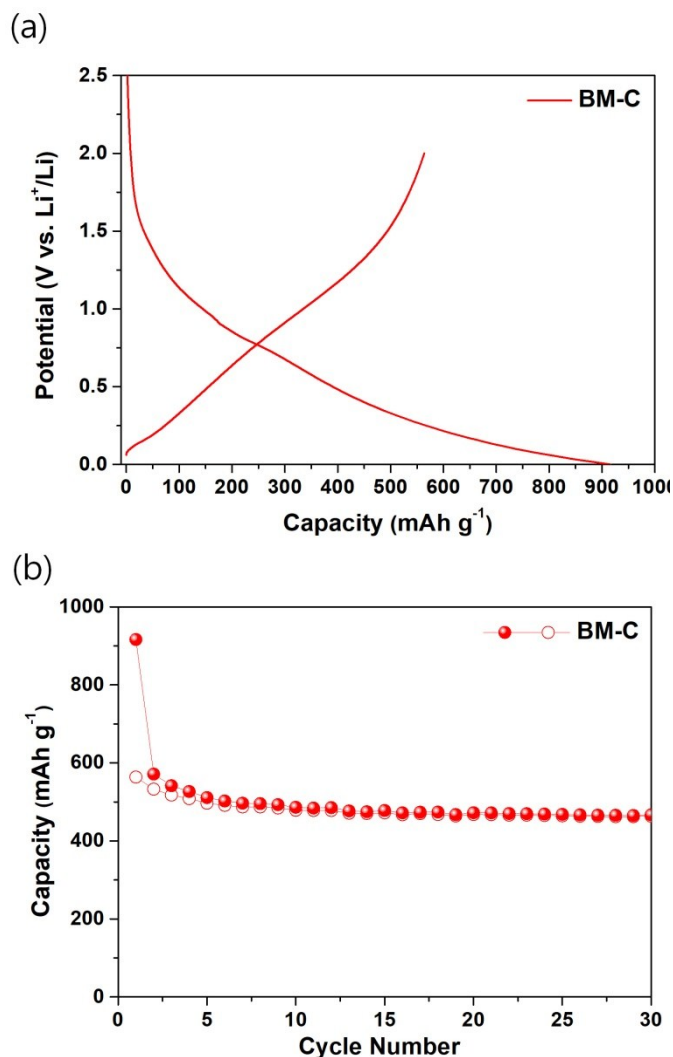

**Figure S7. Electrochemical performances of the BM-C electrode.** (a) Voltage profile of the BM-C electrode (current density:  $100 \text{ mA g}^{-1}$ ). (b) Cycling behavior of the BM-C electrode (cycling rate:  $100 \text{ mA g}^{-1}$ ).

## 8. XRD and electrochemical behaviors of the Ge–C and Te–C.

Ge–C and Te–C composites were fabricated by BM processing for 6 h using the bulk–Ge, –Te, and carbon black powders, respectively and their corresponding XRD results are shown in Figure S8a and c. Figure S8b and d compares the electrochemical performance results of Ge–C and Te–C. The Ge–C and Te–C showed high first Li-insertion/extraction capacities of 1218/1030 mA h g<sup>-1</sup> with a high ICE of 84.6% and 551/399 mA h g<sup>-1</sup> with a high ICE of 72.4%, respectively.

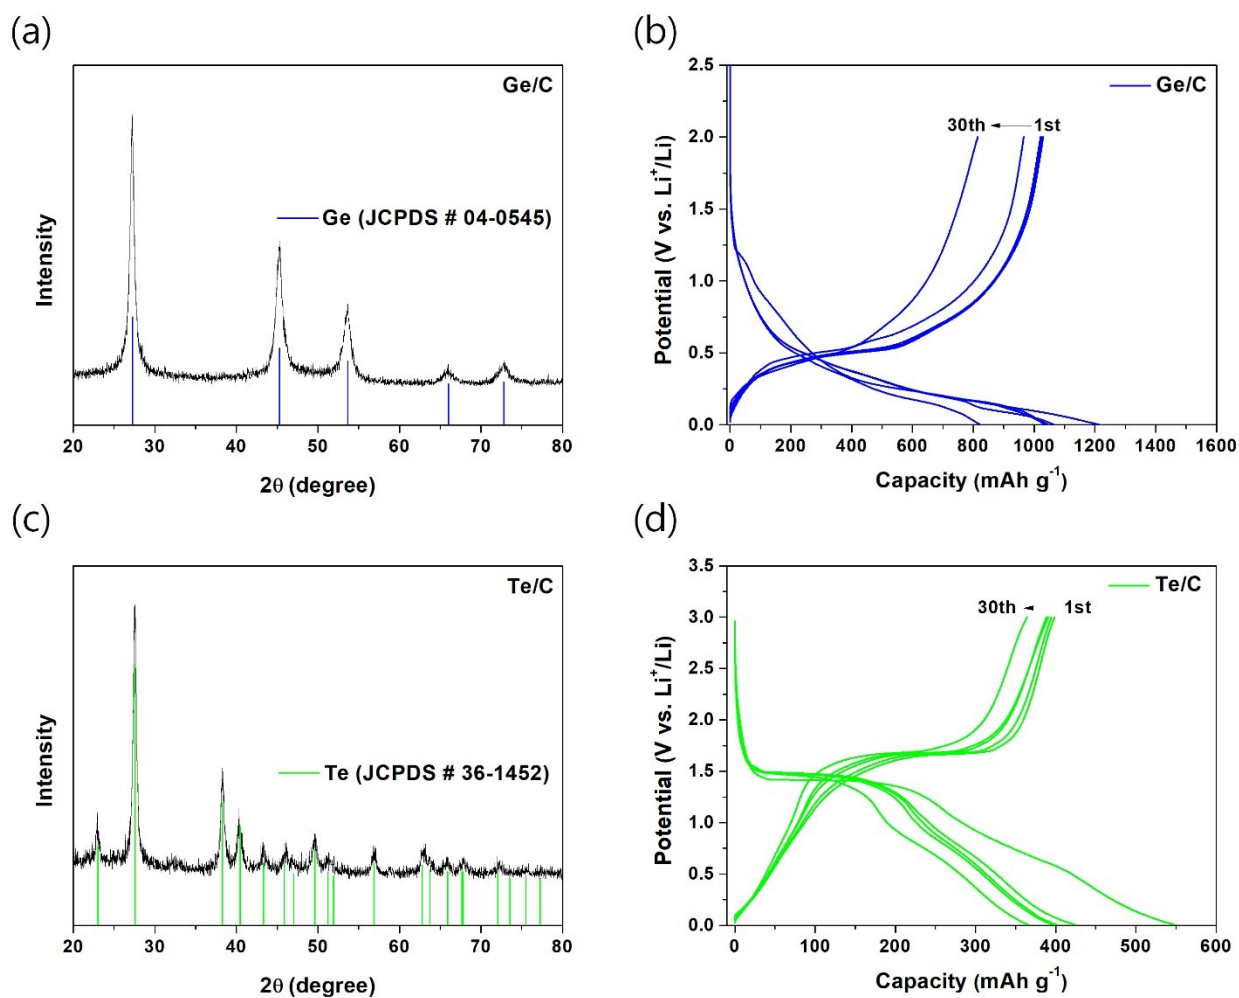

**Figure S8. XRD and electrochemical behaviors of the Ge–C and Te–C.** (a) XRD result of Ge–C. (b) Voltage profile of Ge–C electrode (current density: 100 mA g<sup>-1</sup>). (c) XRD result of Te–C. (d) Voltage profile of Te–C electrode (current density: 100 mA g<sup>-1</sup>).

### 9. Comparison of the gravimetric capacities of the GeTe–C at various C-rates.

The rate-capability of the GeTe–C as a function of the C-rate (1C represents the full use of the restricted first Li-extracted capacity in 1 h,  $690 \text{ mA h g}^{-1}$ ) was shown in Figure S9. Highly reversible capacities at rapid C-rates were observed: 597, 548, and  $448 \text{ mA h g}^{-1}$  at 1, 2, and 3C. The rapid C-rate capabilities were achieved by the formation of small GeTe nanocrystallites in the amorphous-C matrix through the BM process and repeated Li-insertion/extraction reactions during cycling, which resulted in shorter Li-ion diffusion paths.

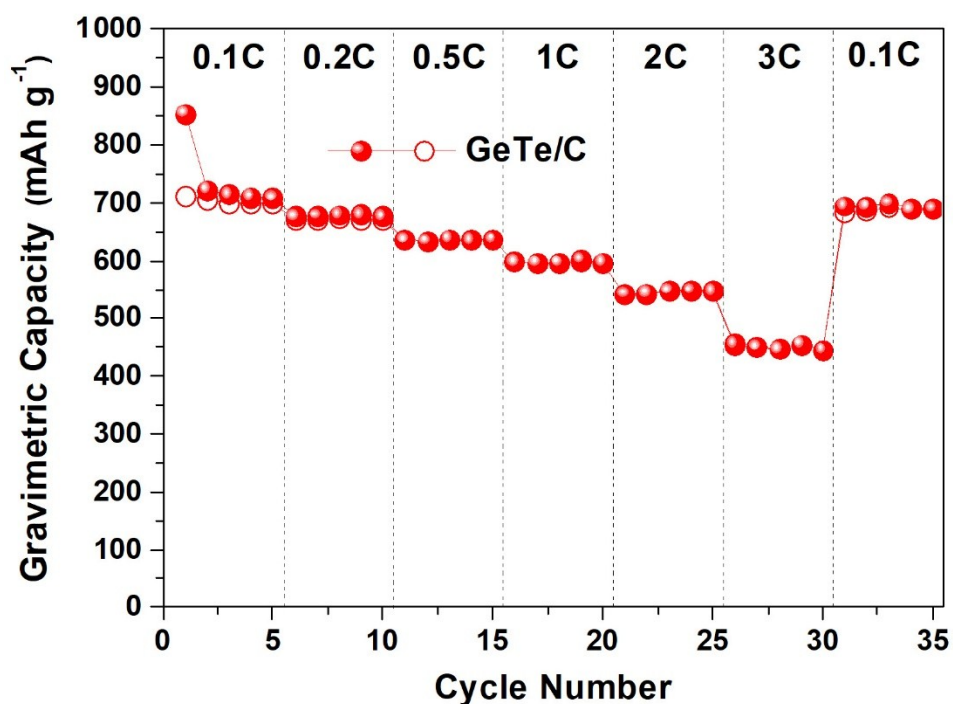

Figure S9. Rate capabilities of GeTe–C ( $1\text{C} = 690 \text{ mA h g}^{-1}$ ) at various C-rates.

## 10. Electrochemical behavior of the full cell (GeTe–C/LCO).

To examine the practical potential of GeTe–C anode, a full cell was fabricated with LCO cathode and as-prepared GeTe–C anode, and its suitability was tested with 2.0–4.0 V at 0.1 C-rate ( $1C\text{-rate} = 150 \text{ mA g}^{-1}$ ), whose result is shown in Figure S10. The full cell was designed with negative/positive (N/P) ratio of 1.1 based on the loading levels (cathode =  $12.129 \text{ mg cm}^{-2}$ , anode =  $2.943 \text{ mg cm}^{-2}$ ). Before the first cycle, the cell was conducted on pre-formation process for stable solid electrolyte interface (SEI) layer at 0.05 C. The full cell showed a relatively high areal capacity of  $\sim 1.2 \text{ mA h cm}^{-2}$  with an appropriated voltage range of 2.0–4.0 V.

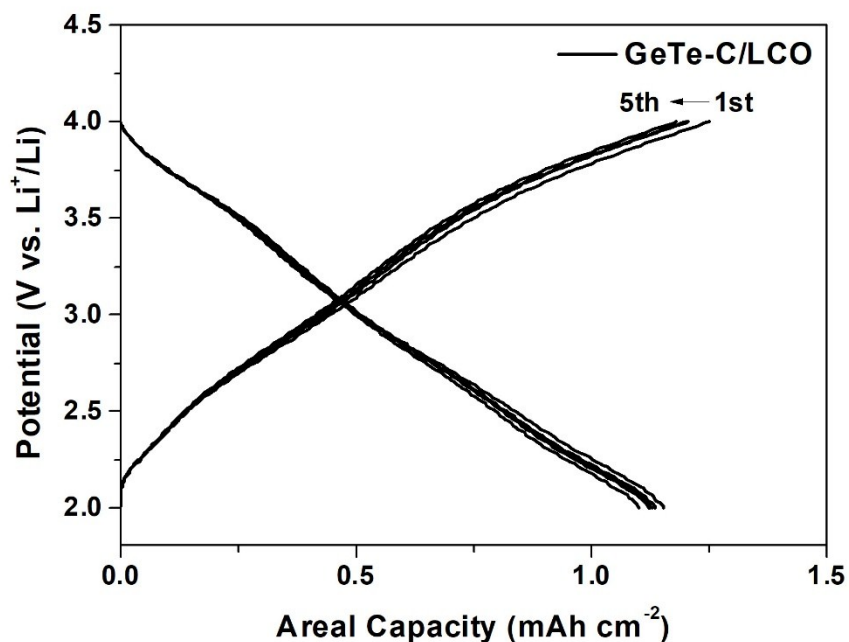

**Figure S10.** Voltage profiles of the full cell with GeTe–C anode and LCO cathode within the potential range of 2.0–4.0 V at 0.1 C-rate ( $=15 \text{ mA g}^{-1}$ ).
